# Supplementary material for: Comparative Proteomic Analysis of the Molecular Responses of Mouse Macrophages to Titanium Dioxide and Copper Oxide Nanoparticles Unravels Some Toxic Mechanisms for Copper Oxide Nanoparticles in Macrophages
Source: PubMed Central journal article supplement (PMC4406518; doi:10.1371/journal.pone.0124496), 2015-04-22
Supplement: pone.0124496.s001.pdf [file pone.0124496.s001.pdf]

**Supporting information Figure S1:** TEM images of the nanoparticles used in this study after dispersion.

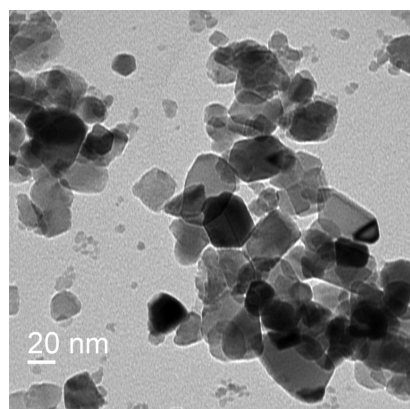

A

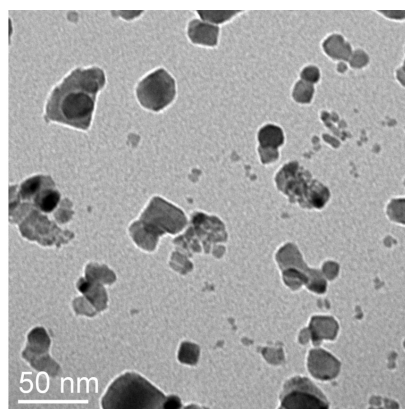

B

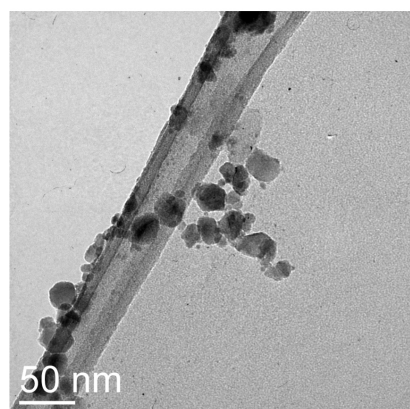

C

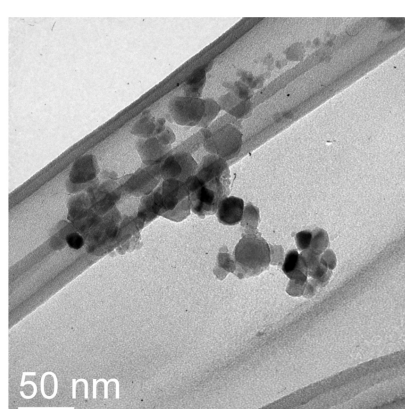

D

A and B: Titanium dioxide

C and D: Copper oxide
