# Supplementary material for: Comparative Proteomic Analysis of the Molecular Responses of Mouse Macrophages to Titanium Dioxide and Copper Oxide Nanoparticles Unravels Some Toxic Mechanisms for Copper Oxide Nanoparticles in Macrophages
Source: PubMed Central journal article supplement (PMC4406518; doi:10.1371/journal.pone.0124496), 2015-04-22
Supplement: pone.0124496.s002.pdf [file pone.0124496.s002.pdf]

**Supporting Information Figure S2 : detail of the 2D gels with highlighted spots part 1**

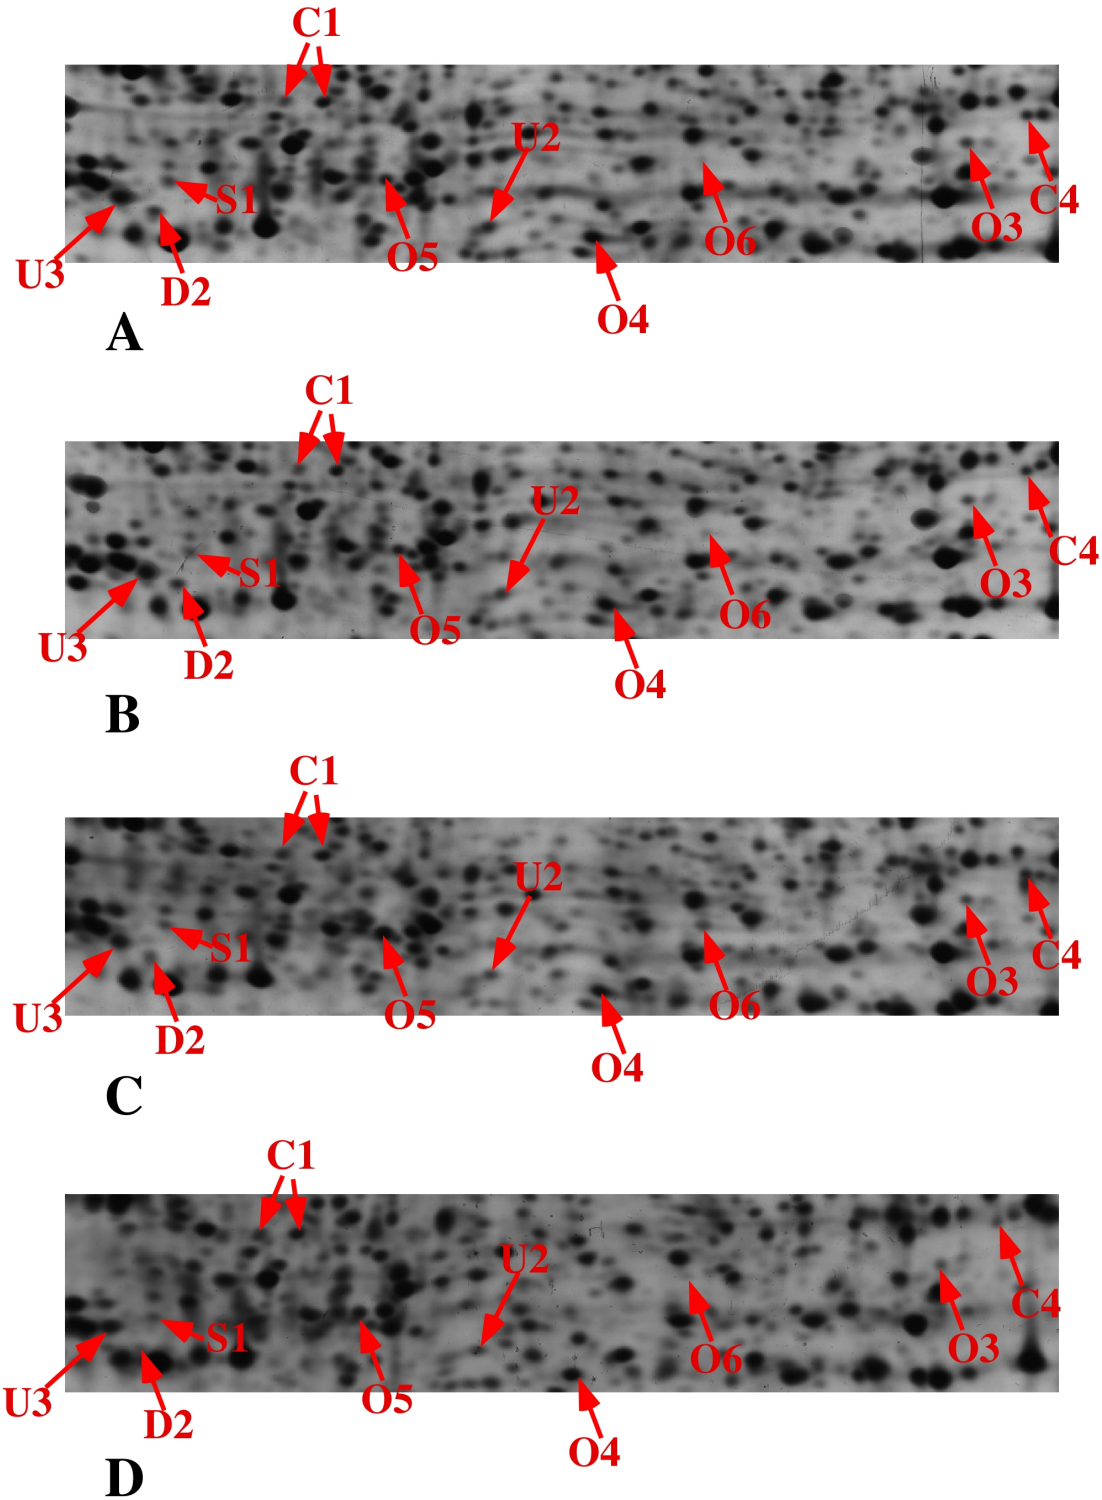

- A: gel obtained from control cells
- B: gel obtained from cells treated with titanium oxide (100µg/ml, 24 hours)
- C: gel obtained from cells treated with copper oxide (10µg/ml, 24 hours)
- D: gel obtained from cells treated with copper ions (125µM, 24 hours)

The arrows point to spots that show reproducible and statistically significant changes between the control and NP-treated cells ( $p \leq 0.05$ ). Spot numbering according to Table 3.
