# Supplementary material for: Comparative Proteomic Analysis of the Molecular Responses of Mouse Macrophages to Titanium Dioxide and Copper Oxide Nanoparticles Unravels Some Toxic Mechanisms for Copper Oxide Nanoparticles in Macrophages
Source: PubMed Central journal article supplement (PMC4406518; doi:10.1371/journal.pone.0124496), 2015-04-22
Supplement: pone.0124496.s003.pdf [file pone.0124496.s003.pdf]

**Supporting Information Figure S3 : detail of the 2D gels with highlighted spots part 2**

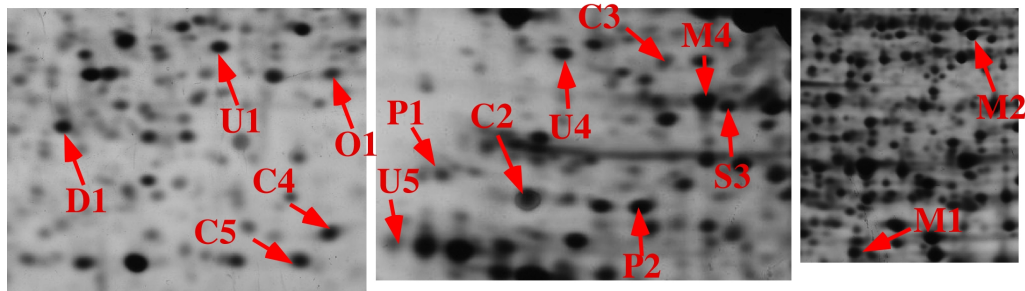

**A**

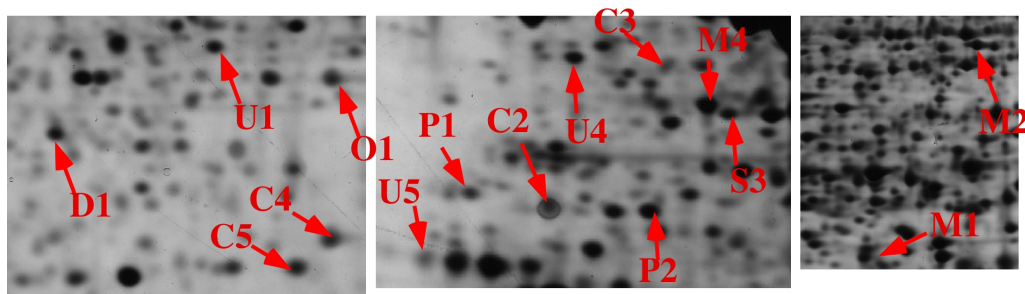

**B**

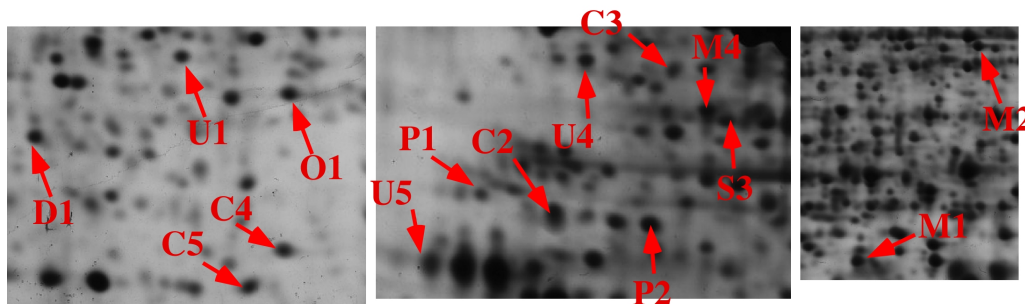

**C**

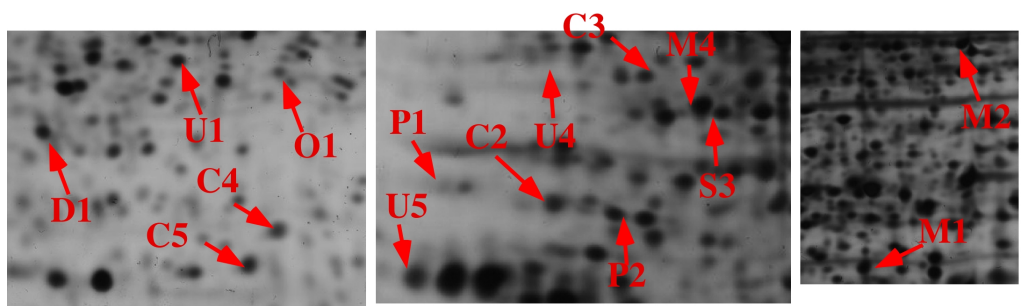

**D**

A: gel obtained from control cells

B: gel obtained from cells treated with titanium oxide (100 $\mu$ g/ml, 24 hours)

C: gel obtained from cells treated with copper oxide (10 $\mu$ g/ml, 24 hours)

D: gel obtained from cells treated with copper ions (125 $\mu$ M, 24 hours)

The arrows point to spots that show reproducible and statistically significant changes between the control and NP-treated cells ( $p \leq 0.05$ ). Spot numbering according to Table 3.
